# Supplementary material for: Factors Influencing Public Attitudes towards COVID-19 Vaccination: A Scoping Review Informed by the Socio-Ecological Model
Source: MDPI journal article supplement (doi:10.3390/vaccines9060548), 2021-05-24
Supplement: s1 [file s1]

**Table S1.** Summary table of the factors associated with hesitancy or acceptance of COVID-19 vaccines.

| First Author/<br>Year of Publication | Hesitancy (-)<br>or Acceptance (+)<br>of COVID-19 vaccine | Socio-demographics Shaping<br>public Attitude towards<br>COVID-19 Vaccine                                          | Individual Factors Shaping<br>Public Attitude Towards<br>COVID-19 Vaccine                                                                                                                                     | Social Networks and Organizational Factors<br>(Family, Friends, HC Providers, Employers)<br>and Media Shaping<br>Public Attitude towards<br>COVID-19 Vaccine | Characteristics of<br>COVID-19 Vaccine Shaping<br>Public Attitude towards<br>COVID-19 Vaccine |
|--------------------------------------|-----------------------------------------------------------|--------------------------------------------------------------------------------------------------------------------|---------------------------------------------------------------------------------------------------------------------------------------------------------------------------------------------------------------|--------------------------------------------------------------------------------------------------------------------------------------------------------------|-----------------------------------------------------------------------------------------------|
| Chen, T.E. 2021<br>[23]              | +                                                         | -High education level<br>-Increasing age                                                                           |                                                                                                                                                                                                               | -Type of messages received, and message frames<br>-Outcome uncertainty<br>-Number format<br>-Numeracy skills                                                 |                                                                                               |
| Chen, M.S. 2020<br>[24]              | +                                                         | -Male gender<br>-High income<br>-Education level<br>-The Han nationality                                           | -Confidence, satisfaction and worry about risks.<br>-Attention to relevant COVID-19 information<br>-Perceived views of the severity of COVID-19 disease<br>-Degree of concern regarding the COVID-19 pandemic |                                                                                                                                                              | -If domestic vaccine and not imported vaccine                                                 |
| Lazarus, J. V.<br>2020 [25]          | +                                                         | -Age older than 25<br>-Male gender<br>-High income<br>-High education level<br>-Sick people or sick family members | -Trust in government.                                                                                                                                                                                         | -Accept their employer's recommendation to do so                                                                                                             | -Vaccine approved safe and effective by the government                                        |
| Bell, S. 2020 [26]                   | -                                                         | -Black, Asian, Chinese, Mixed or other ethnicity<br>-Low income                                                    |                                                                                                                                                                                                               |                                                                                                                                                              |                                                                                               |
| Coustasse, A.<br>2020 [27]           | +                                                         | -60 years and older<br>-Non-Hispanics Whites                                                                       |                                                                                                                                                                                                               |                                                                                                                                                              | -Effectiveness estimate of the vaccine                                                        |

|                            |     |                                                                                                                                                                                 |                                                                                                                                                        |                                                                                   |                                                                                                                                                                                                                                                                                                                                                                                                                     |
|----------------------------|-----|---------------------------------------------------------------------------------------------------------------------------------------------------------------------------------|--------------------------------------------------------------------------------------------------------------------------------------------------------|-----------------------------------------------------------------------------------|---------------------------------------------------------------------------------------------------------------------------------------------------------------------------------------------------------------------------------------------------------------------------------------------------------------------------------------------------------------------------------------------------------------------|
|                            | +/- | <ul style="list-style-type: none"> <li>-High education level</li> <li>-High income</li> </ul>                                                                                   |                                                                                                                                                        |                                                                                   | <ul style="list-style-type: none"> <li>-Safety based on its newness and adverse effects</li> <li>-Lack of testing</li> <li>-Time frame for a vaccine</li> <li>-Who will have access to it</li> <li>-Cost to consumers,</li> <li>-How states and the federal government will determine vaccination methods</li> <li>-Catching COVID-19 from the shot</li> <li>-Fear side effects from an untested vaccine</li> </ul> |
| Al-Mohaithef, M. 2020 [28] | -   | <ul style="list-style-type: none"> <li>-Older age</li> <li>-Being married</li> <li>-High education level</li> <li>-Non-Saudi</li> <li>-Employed in government sector</li> </ul> |                                                                                                                                                        |                                                                                   |                                                                                                                                                                                                                                                                                                                                                                                                                     |
| Robles, AS. 2020 [29]      | +   | <ul style="list-style-type: none"> <li>-Age,</li> <li>-Ethnicity</li> <li>-Chronic disease</li> <li>-Education level</li> <li>-Employment status</li> <li>-Country</li> </ul>   |                                                                                                                                                        |                                                                                   | <ul style="list-style-type: none"> <li>-Perception of efficacy, safety, and adverse effects of vaccine,</li> <li>-Source of information</li> <li>-Conspiracy theory</li> <li>-Reactance and outrage to new information.</li> </ul>                                                                                                                                                                                  |
| Wang, J. 2020 [30]         | +   | <ul style="list-style-type: none"> <li>-Male gender</li> <li>-Being married</li> </ul>                                                                                          | <ul style="list-style-type: none"> <li>-Perceiving a high risk of infection</li> <li>-Being vaccinated against influenza in the past season</li> </ul> | <ul style="list-style-type: none"> <li>-Value doctor's recommendations</li> </ul> | <ul style="list-style-type: none"> <li>-The efficacy of COVID-19 vaccination</li> <li>-Concerns about vaccine safety</li> </ul>                                                                                                                                                                                                                                                                                     |
|                            | +/- |                                                                                                                                                                                 |                                                                                                                                                        |                                                                                   |                                                                                                                                                                                                                                                                                                                                                                                                                     |

|                      |   |                                                                                                                                                                                                                                           |                                                                                                                                                                                              |                                                                                                                                                                                                                                                                            |
|----------------------|---|-------------------------------------------------------------------------------------------------------------------------------------------------------------------------------------------------------------------------------------------|----------------------------------------------------------------------------------------------------------------------------------------------------------------------------------------------|----------------------------------------------------------------------------------------------------------------------------------------------------------------------------------------------------------------------------------------------------------------------------|
|                      | + |                                                                                                                                                                                                                                           |                                                                                                                                                                                              | <ul style="list-style-type: none"> <li>-Newness of COVID-19 vaccines</li> <li>-Inadequate information</li> <li>-Unknown/short duration of immunity</li> <li>-Cost</li> <li>-Country of vaccine origin</li> <li>-Fear of side effects, safety, and effectiveness</li> </ul> |
| Lin, C. 2021 [31]    |   | <ul style="list-style-type: none"> <li>-College degrees</li> <li>-Income,</li> <li>-Insurance,</li> <li>-Living in rural or larger areas</li> <li>-Gender</li> <li>-Race.</li> </ul>                                                      | <ul style="list-style-type: none"> <li>-Belief that vaccines are unnecessary</li> <li>-Inadequate information,</li> <li>-General anti-vaccine stand</li> <li>-Willingness to pay.</li> </ul> |                                                                                                                                                                                                                                                                            |
|                      | - |                                                                                                                                                                                                                                           |                                                                                                                                                                                              |                                                                                                                                                                                                                                                                            |
|                      |   | <b>Irish sample vaccine hesitant</b> <ul style="list-style-type: none"> <li>-Female gender</li> <li>-Aged between 35 and 44 years,</li> <li>-Have no mental health problem.</li> </ul>                                                    |                                                                                                                                                                                              |                                                                                                                                                                                                                                                                            |
|                      |   | <b>Irish sample vaccine resistant</b> <ul style="list-style-type: none"> <li>-Aged 35–44 years</li> <li>-Residing in a city</li> <li>-Non-Irish ethnicity</li> <li>-Lower income</li> <li>-Have an underlying health condition</li> </ul> | <ul style="list-style-type: none"> <li>-Irish sample, more likely to have voted for the political party Sinn Féin or an independent political in the previous general election.</li> </ul>   |                                                                                                                                                                                                                                                                            |
| Murphy, J. 2021 [32] | - |                                                                                                                                                                                                                                           |                                                                                                                                                                                              |                                                                                                                                                                                                                                                                            |
|                      |   | <b>UK sample vaccine hesitant</b> <ul style="list-style-type: none"> <li>-Female gender</li> <li>-Younger than 65</li> </ul>                                                                                                              |                                                                                                                                                                                              |                                                                                                                                                                                                                                                                            |
|                      |   | <b>UK sample vaccine resistant</b> <ul style="list-style-type: none"> <li>-Age younger</li> <li>-More likely to reside in a suburb</li> <li>-In the three lowest income brackets</li> <li>-Being pregnant</li> </ul>                      |                                                                                                                                                                                              |                                                                                                                                                                                                                                                                            |
| Akarsu, B. 2020 [33] | - | <ul style="list-style-type: none"> <li>-Female gender</li> <li>-Unemployed</li> </ul>                                                                                                                                                     | <ul style="list-style-type: none"> <li>-“Afraid of the side effects of vaccine”</li> </ul>                                                                                                   |                                                                                                                                                                                                                                                                            |

|                        |                                 |                                                                                                                                                                                                                                                                     |                                                                                                                                                                                                                                                                                                                                          |
|------------------------|---------------------------------|---------------------------------------------------------------------------------------------------------------------------------------------------------------------------------------------------------------------------------------------------------------------|------------------------------------------------------------------------------------------------------------------------------------------------------------------------------------------------------------------------------------------------------------------------------------------------------------------------------------------|
|                        |                                 | <ul style="list-style-type: none"> <li>-Have SSI or private health insurance</li> <li>-Have children</li> <li>-Those who were thinking about getting their child COVID-19 vaccine were more willing to get vaccinated.</li> <li>-High level of education</li> </ul> | <ul style="list-style-type: none"> <li>-“Don't think it can be reliable as it will be a new vaccine”</li> <li>-“COVID-19 infection is a biological weapon</li> <li>-“The vaccine will serve those who produce this virus”</li> <li>-Got seasonal flu vaccine</li> <li>-High level of anxiety</li> </ul>                                  |
|                        | +                               |                                                                                                                                                                                                                                                                     |                                                                                                                                                                                                                                                                                                                                          |
| Seale, H. 2021 [34]    | +                               | <ul style="list-style-type: none"> <li>-Female gender.</li> <li>-Ged 70 years and above</li> <li>-Reported chronic disease</li> <li>-Held private health insurance.</li> </ul>                                                                                      | -Decision to vaccinate would be supported by family and friends.                                                                                                                                                                                                                                                                         |
| Hursh, S.R. 2020 [35]  | -                               | -Male gender                                                                                                                                                                                                                                                        | -Greater conspiracy beliefs and political conservatism                                                                                                                                                                                                                                                                                   |
| Biasio, L.R. 2020 [36] | Attitudes to a COVID-19 vaccine |                                                                                                                                                                                                                                                                     | -Health literacy                                                                                                                                                                                                                                                                                                                         |
| Kourlaba, G. 2021 [37] | +                               | <ul style="list-style-type: none"> <li>-Aged &gt; 65 years old</li> <li>-Those who either they or a member of their household belonged to a vulnerable group.</li> </ul>                                                                                            | <ul style="list-style-type: none"> <li>-Those believing that the COVID-19 virus was not developed in laboratories by humans</li> <li>-Those believing that coronavirus is far more contagious and lethal compared to the H1N1 virus</li> <li>-Those believing that next waves are coming</li> <li>-Higher knowledge score re-</li> </ul> |

|                           |   |                                                            |                                                                                                                                                                                                                                                                                            |                                                                                                                                                                                                                                                 |
|---------------------------|---|------------------------------------------------------------|--------------------------------------------------------------------------------------------------------------------------------------------------------------------------------------------------------------------------------------------------------------------------------------------|-------------------------------------------------------------------------------------------------------------------------------------------------------------------------------------------------------------------------------------------------|
|                           |   |                                                            | garding symptoms, transmission routes and prevention and control measures against COVID-19.                                                                                                                                                                                                |                                                                                                                                                                                                                                                 |
| Fisher, K. 2020 [38]      | - | -Young age<br>-Black race<br>-Low educational attainment.  | -Vaccine-specific concerns<br>-A need for more information<br>-General anti-vaccine beliefs<br>-A lack of trust.                                                                                                                                                                           | -Vaccine-specific concerns<br>-A need for more information.                                                                                                                                                                                     |
| Guidry, J. P.D. 2021 [39] | + | -Education<br>-Having insurance<br>-Age<br>-Race/ethnicity | -Positive subjective norms<br>-A positive attitude toward the vaccines in general<br>-Perceived susceptibility to COVID-19<br>-High perceived benefits of the vaccine<br>-Scoring low on barriers to the vaccine<br>-Scoring high on self-efficacy<br>- High perceived behavioral control. |                                                                                                                                                                                                                                                 |
| Jung, H. 2020 [40]        | + |                                                            | Prosocial concern for vaccination motivates vaccination in more and less populated regions                                                                                                                                                                                                 |                                                                                                                                                                                                                                                 |
| Popa, G.L. 2020 [41]      | - |                                                            | -Lack of information<br>-Fear of adverse reactions<br>-Fears of toxicity and poor quality related to vaccine components<br>-Doubts about the technology used to produce the vaccine.<br>-Personal reasons to refuse vaccines (which included religious conviction)                         | -Disinformation (through classic media, social media and the Internet)<br>-Fear of adverse reactions<br>-Fear of toxicity and poor quality related to vaccine components<br>-Doubts about the technology used to produce the vaccine<br>-Price. |

|                              |   |                                   |                                                                                                      |                                                                                          |
|------------------------------|---|-----------------------------------|------------------------------------------------------------------------------------------------------|------------------------------------------------------------------------------------------|
|                              |   |                                   | -Lack of trust in the healthcare system.                                                             |                                                                                          |
| Detoc, M. 2020 [42]          | + | -Older age,<br>-Male gender       | Fear about COVID-19, and individual perceived risk                                                   |                                                                                          |
| Prati, G. 2021 [43]          | - | Attitudes to a COVID-19 vaccine   | -Being worried about the non-natural origin of the virus, and the role of institutional trust        |                                                                                          |
| Marco-Franco, J. E. 2021[44] | - |                                   |                                                                                                      | Worry about the side effects, safety and effectiveness of vaccine.                       |
| Caserotti, M. 2021 [45]      | + |                                   | -Likelihood of getting the infection<br>-Perceived severity for the disease.                         |                                                                                          |
| Bogart, L.M. 2021 [46]       | + |                                   |                                                                                                      | -Social service and health care providers                                                |
| Alley, S.J. 2021 [47]        | - | -Low education<br>-Female gender. |                                                                                                      | -Infrequent users of traditional media                                                   |
| Puri, N. 2020 [48]           | - |                                   |                                                                                                      | -Anti vaccination messages on social platforms.                                          |
| Reiter, P.L. 2020 [49]       | + |                                   | -Likelihood getting a COVID-19 infection in the future,<br>-Perceived severity of COVID-19 infection | -Healthcare provider would recommend vaccination<br>-Effectiveness of a COVID-19 vaccine |
| Feleszko, W. 2021 [50]       | + |                                   |                                                                                                      | -Recommended by a family doctor<br>-Someone from /family/friends was vaccinated          |

|                        |   |                                                                                                                                                                                                                                                                      |                                                                                                                                                                                                                                                                                                                                                                                                             |                                                                                                                                                                                                                                 |
|------------------------|---|----------------------------------------------------------------------------------------------------------------------------------------------------------------------------------------------------------------------------------------------------------------------|-------------------------------------------------------------------------------------------------------------------------------------------------------------------------------------------------------------------------------------------------------------------------------------------------------------------------------------------------------------------------------------------------------------|---------------------------------------------------------------------------------------------------------------------------------------------------------------------------------------------------------------------------------|
|                        |   |                                                                                                                                                                                                                                                                      | -Need a vaccination certificate to enter some countries                                                                                                                                                                                                                                                                                                                                                     |                                                                                                                                                                                                                                 |
| Danchin, M. 2020 [51]  | - | <ul style="list-style-type: none"> <li>-Low education</li> <li>-Low income</li> <li>-Potentially more prone to infectious diseases</li> <li>-Women aged &lt;35 years</li> <li>-People aged &gt;75 years, who are at higher risk of disease from COVID-19.</li> </ul> | -Adequate health literacy.                                                                                                                                                                                                                                                                                                                                                                                  | -Vaccine safety and effectiveness.                                                                                                                                                                                              |
| Harapan, H. 2020 [52]  | + |                                                                                                                                                                                                                                                                      | - Perceived risk of COVID-19 infection                                                                                                                                                                                                                                                                                                                                                                      | -The baseline effectiveness of the vaccine.                                                                                                                                                                                     |
| Lin, Y. 2020 [53]      | + | -Self-employed and in a service occupation                                                                                                                                                                                                                           | <ul style="list-style-type: none"> <li>-Perceived overall health as very good</li> <li>-Perceived the benefit of feeling less worry of contracting the coronavirus after getting the vaccine,</li> <li>-Perceived the benefit of the COVID-19 vaccine in reducing the risk of infection and resultant complications.</li> <li>-If given adequate information and if taken by many in the public.</li> </ul> | <ul style="list-style-type: none"> <li>-Concerns about faulty/fake vaccine,</li> <li>-Affordability and high price,</li> <li>-Safety and efficacy.</li> <li>-Confidence and preference of domestically-made vaccines</li> </ul> |
| Williams, L. 2020 [54] | + | <ul style="list-style-type: none"> <li>-White ethnicity</li> <li>-High education level</li> <li>-High income</li> <li>-High-risk/shielding</li> </ul>                                                                                                                | <ul style="list-style-type: none"> <li>COVID-19 will persist over time,</li> <li>-Perceiving the media to have over-exaggerated the risk.</li> <li>-The 'beliefs about consequences' TDF domain, with</li> </ul>                                                                                                                                                                                            | -Personal concerns of vaccine safety.                                                                                                                                                                                           |

|                             | Attitudes to<br>a COVID-19<br>vaccine |                                                                                           | themes relating to personal<br>health, health consequences to<br>others, and severity of<br>COVID-19.                                            |                                                                                                                                                                                   |
|-----------------------------|---------------------------------------|-------------------------------------------------------------------------------------------|--------------------------------------------------------------------------------------------------------------------------------------------------|-----------------------------------------------------------------------------------------------------------------------------------------------------------------------------------|
| Yin, F. 2021 [55]           | +                                     |                                                                                           |                                                                                                                                                  | -Majority thought price in-<br>expensive<br>-Positive views on side ef-<br>fects<br>-Information about inacti-<br>vated vaccines (inactivated<br>vaccines are more ac-<br>cepted) |
| Alqudeimat, Y.<br>2021 [56] | +<br>-                                | -Male gender                                                                              | -Likelihood of infection,<br>-Viewed vaccines in general<br>to have health-related risks                                                         |                                                                                                                                                                                   |
| Sallam, M. 2021<br>[57]     | +<br>-                                | -Male gender<br>-High education levels,<br>-History of chronic disease                    | -Beliefs that COVID-19 vac-<br>cines are intended to inject<br>microchips into recipients and<br>that the vaccines are related to<br>infertility |                                                                                                                                                                                   |
| Wong, L.P. 2020<br>[58]     | +                                     | -Higher education levels<br>-Professional and managerial oc-<br>cupations<br>-High income |                                                                                                                                                  |                                                                                                                                                                                   |
| Nguyen, K.H.<br>2020 [59]   | -                                     | -Young adults<br>-Female gender<br>-Non-Hispanic Black (Black) per-<br>sons               |                                                                                                                                                  |                                                                                                                                                                                   |



|                         |                                 |                                                                                                                               |                                                                                   |                                                                                                                |
|-------------------------|---------------------------------|-------------------------------------------------------------------------------------------------------------------------------|-----------------------------------------------------------------------------------|----------------------------------------------------------------------------------------------------------------|
|                         |                                 | -Adults living in nonmetropolitan areas,<br>-Adults with lower educational attainment,<br>-Low income<br>-No health insurance |                                                                                   |                                                                                                                |
| Wang, K.L. 2021 [60]    | +                               | -Young age<br>-Male gender<br>-Being married                                                                                  | -Influenza vaccine uptake last year                                               | effectiveness<br>-Thought of vaccine as unnecessary<br>-More accepted in the first wave compared to third wave |
|                         | -                               |                                                                                                                               |                                                                                   |                                                                                                                |
| Largent, E.A. 2020 [61] | +                               | -Non-Black respondents to get vaccinated, 40.9% of respondents found state<br>-Respondents with a bachelor's degree or higher | -Republicans and Independents were less likely to get vaccinated than Democrats.  |                                                                                                                |
|                         | -                               |                                                                                                                               |                                                                                   |                                                                                                                |
| LaVecchia, K. 2020 [62] | +                               |                                                                                                                               | -Age above 55.<br>-Workers, professionals, managers, teachers and manual workers. |                                                                                                                |
| Ward, J.K. 2020 [63]    | Attitudes to a COVID-19 vaccine |                                                                                                                               | -Political partisanship and engagement with the political system                  |                                                                                                                |
| Romer, D. 2020 [64]     | -                               |                                                                                                                               | -Belief in three COVID-19-related conspiracy theories.                            |                                                                                                                |

|                                               |  |                                                                                                                                                                                                                                                                                                                                                                                                                                                                                                                                           |
|-----------------------------------------------|--|-------------------------------------------------------------------------------------------------------------------------------------------------------------------------------------------------------------------------------------------------------------------------------------------------------------------------------------------------------------------------------------------------------------------------------------------------------------------------------------------------------------------------------------------|
| <p>Sherman, S.M.<br/>2020 [65]</p> <p>+</p>   |  | <ul style="list-style-type: none"> <li>-Having been vaccinated for influenza last winter</li> <li>-Perceiving a great risk of COVID-19</li> <li>-Positive general COVID-19 vaccination beliefs and attitudes</li> <li>-Weak beliefs that the vaccination would cause side effects</li> <li>-Greater perceived information sufficiency to make an informed decision about COVID-19 vaccination.</li> <li>-Lower endorsement of the notion that only people who are at risk of serious illness should be vaccinated for COVID-19</li> </ul> |
| <p>McCaffery, K.J.<br/>2020 [66]</p> <p>-</p> |  | <ul style="list-style-type: none"> <li>-Beliefs and misinformation about COVID-19/ vaccine,</li> <li>-Inadequate health literacy.</li> </ul>                                                                                                                                                                                                                                                                                                                                                                                              |
| <p>Pogue, K. 2020<br/>[67]</p> <p>+</p>       |  | <ul style="list-style-type: none"> <li>-Respondents who routinely got vaccines were more likely to be receptive to receiving the COVID-19 vaccine.</li> <li>-The greater the perceived impact of COVID-19 on America, the more receptive the respondent was to receive a potential COVID-19 vaccine.</li> </ul>                                                                                                                                                                                                                           |

|                         |   |                                                                                                                                                                                                                                                                                                                                      |
|-------------------------|---|--------------------------------------------------------------------------------------------------------------------------------------------------------------------------------------------------------------------------------------------------------------------------------------------------------------------------------------|
| Taylor, S. 2020 [68]    | - | <ul style="list-style-type: none"> <li>-Mistrust of vaccine benefit</li> <li>-Worry about unforeseen future negative effects</li> <li>-Concerns about commercial profiteering</li> <li>-Preference for natural immunity</li> </ul>                                                                                                   |
| Reuben, R. C. 2020 [69] | - | No confidence in the present intervention by Chinese doctors                                                                                                                                                                                                                                                                         |
| Corpuz, R. 2020 [70]    | + | <ul style="list-style-type: none"> <li>-Those exhibiting a slow life history orientation were more likely to endorse mandatory vaccination for COVID-19.</li> <li>-Social and political conservatism</li> </ul>                                                                                                                      |
| Bertin, P. 2020 [71]    | - | -Covid-19 conspiracy beliefs                                                                                                                                                                                                                                                                                                         |
| Ling, R. 2020 [72]      | - | -Confirmation bias, consume only news that confirms our pre-existing attitudes and beliefs.                                                                                                                                                                                                                                          |
| Dube, E. 2020 [73]      | - | <ul style="list-style-type: none"> <li>The vaccine development is being pushed</li> <li>-COVID-19 vaccine antigen carrying platforms have never been used</li> <li>-The production of new COVID-19 vaccines will not meet demand</li> <li>-Conspiracy theories</li> <li>-More than one type of COVID vaccine is likely to</li> </ul> |

---

be used within a country.  
Thus, the safety and efficacy profiles may vary.

---
